# Supplementary material
Source: PubMed Central journal article supplement (PMC3033260)
Supplement: 1008823108_pnas.201008823SI.pdf [file 1008823108_pnas.201008823SI.pdf]

# Supporting Information

Bouma et al. 10.1073/pnas.1008823108

## SI Materials and Methods

**Blood Sample Analysis.** After animals were killed by i.p. pentobarbital, 250  $\mu$ L of blood collected via cardiac puncture into EDTA-coated cups (micollect EDTA-K3; Greiner) was analyzed on the Sysmex XE-2100, an automated hematology analyzer (1, 2). Differential leukocyte counts were validated manually using Wright-Giemsa–stained blood smears. The remainder of the blood was collected in a polypropylene tube, mixed 1:10 (vol/vol) with a solution containing prostaglandin E1 (94 nmol/L) (Sigma-Aldrich),  $\text{Na}_2\text{CO}_3$  (0.63 mmol/L) (Sigma-Aldrich), EDTA (90 mM) (Titrplex; Sigma-Aldrich), and theophylline (10 mM) (Sigma-Aldrich) to minimize platelet activation. Samples were centrifuged for 30 min at  $17,000 \times g$  at  $4^\circ\text{C}$ , snap-frozen in liquid nitrogen, and stored at  $-80^\circ\text{C}$ .

**Labeling of Lymphocytes.** To obtain lymphocytes for autologous transfusion, Syrian hamsters were splenectomized as described in *Materials and Methods*. A cannula was placed into the jugular vein connected to an s.c. access port (Soloport; Instech Solomon) implanted between the scapulas for infusion of cells during torpor. The spleen was cut into small pieces and washed on a  $70\text{-}\mu\text{m}$  cell strainer (Greiner) with sterile saline to obtain a suspension of splenocytes. Cells were spun down for 10 min at  $800 \times g$  at  $4^\circ\text{C}$  and were resuspended onto a layer of Lympholyte Mammal (Cedarlane Laboratories). Lymphocytes then were separated from other cells by centrifuging for 20 min at  $800 \times g$  at  $4^\circ\text{C}$ . The lymphocyte fraction was washed, centrifuged for 10 min at  $800 \times g$  at  $4^\circ\text{C}$ , and resuspended in saline supplemented with 10% DMSO followed by storage in liquid nitrogen. When animals showed torpidity (around 10 wk after splenectomy), lymphocytes were thawed; purity was assessed by analyzing a Wright-Giemsa–stained smear, and viability was measured with a manual cell count after addition of Trypan blue (Sigma-Aldrich). Cells were fluorescently labeled by incubation in 25  $\mu\text{M}$  carboxyfluorescein diacetate succinimidyl ester in saline (Invitrogen) for 15 min at  $37^\circ\text{C}$ . After the labeled lymphocytes were infused during torpor, arousal was induced by gently handling the animals. The animals were killed 2 d after entrance into the subsequent torpor bout.

**Fluorescent Microscopy.** Frozen samples were embedded in Tissue Tek (Sakura), sectioned into  $200\text{-}\mu\text{m}$ -thick slices, and counter stained using TOTO-3 iodide (Invitrogen). Images were taken at  $200\times$  magnification (Leica SP2 AOBS) and processed using Imaris 6.4.

**Real-Time PCR.** RNA isolation was performed using the RNA Isolation Kit (Bioké) according to the manufacturer's instructions.

RNA concentration was determined spectrophotometrically at 260 nm (NanoDrop ND-1000; NanoDrop Technologies), and purity was checked on 1% agarose gel. One microgram of RNA was mixed with 4  $\mu\text{L}$  RT buffer, 0.2  $\mu\text{L}$  dNTP, 0.5  $\mu\text{L}$  Rnasin, 1  $\mu\text{L}$  reverse transcriptase, 1  $\mu\text{L}$  random hexamers (Promega), and  $\text{H}_2\text{O}$  in 20  $\mu\text{L}$ . cDNA was produced on a C1000 Thermal Cycler (Bio-Rad Laboratories). Oligonucleotide primer sequences (Biologio) are shown in [Table S1](#). Amplified products (CFX 384 Real-Time System; Bio-Rad Laboratories) were checked by obtaining melting curves and verification on 1% agarose gels.

**Liquid Chromatography-Electrospray Tandem Mass Spectrometry.** Sphingolipids were extracted and analyzed by liquid chromatography-electrospray tandem mass spectrometry on a PE-Sciex API 3000 triple-quadrupole mass spectrometer equipped with a turbo ion-spray source as described previously (3, 4). HPLC separation was performed as described previously (5), with the following changes: An Alltima C-18 column ( $2.1 \times 150$  mm,  $5 \mu\text{m}$ ; Grace Davison Discovery Sciences) was used at a flow rate of 200  $\mu\text{L}/\text{min}$ .  $\text{N}_2$  was used as the nebulizing gas and drying gas for the turbo ion-spray source. The ion-spray needle was held at 5,500 V; the orifice temperature was set to  $500^\circ\text{C}$ .  $\text{N}_2$  was used to induce dissociations collisionally in Q2. Multiple reaction-monitoring scans were acquired by setting Q1 and Q3 to pass the precursor and product ions of the most abundant sphingolipid molecular species. Multiple reaction-monitoring transitions were optimized for each individual component (C-17SoP: 366.2/250.4; C-17SaP: 368.2/270.4; C-18SoP: 380.2/264.4; C-18SaP: 382.2/284.4; C-17So: 286.2/238.1; C-17Sa: 288.2/240.1; C-18So: 300.2/252.3; C18Sa: 302.2/254.2). Quantitation was achieved by spiking the samples before extraction with sphingosine (d17:1), sphinganine (d17:0), sphingosine-1-phosphate (S1P) (d17:1), and sphinganine-1-phosphate (d17:0) (Avanti Polar Lipids, Inc.).

**Blood Rewarming ex Vivo.** Washed erythrocytes (25  $\mu\text{L}$ ) derived from torpid Syrian hamsters ( $4^\circ\text{C}$ ) were pipetted into small polypropylene tubes (Eppendorf) containing DMEM/F12 cell-culture medium (Invitrogen) supplemented with 40% Probupin (Millipore). An inhibitor for the ATP-binding cassette (ABC)-A1 transporters (glyburide, 1 mM; Sigma-Aldrich), the ABC-C1 transporter (MK571, 50  $\mu\text{M}$ ; Cayman Chemicals), or both was added to the samples. Samples then were incubated at  $37^\circ\text{C}$  for 30 min. Another sample was left at  $4^\circ\text{C}$  for 30 min. After incubation, samples were centrifuged for 30 min at  $17,000 \times g$  at  $4^\circ\text{C}$ . A negative control sample was centrifuged before incubation at  $37$  or  $4^\circ\text{C}$ . Supernatant was snap-frozen in liquid nitrogen and stored at  $-80^\circ\text{C}$ .

1. Briggs C, Harrison P, Grant D, Staves J, MacHin SJ (2000) New quantitative parameters on a recently introduced automated blood cell counter—the XE 2100. *Clin Lab Haematol* 22:345–350.
2. Ruzicka K, Veitl M, Thalhammer-Scherrer R, Schwarzwinger I (2001) The new hematology analyzer Sysmex XE-2100: performance evaluation of a novel white blood cell differential technology. *Arch Pathol Lab Med* 125:391–396.
3. Bielawski J, Szulc ZM, Hannun YA, Bielawska A (2006) Simultaneous quantitative analysis of bioactive sphingolipids by high-performance liquid chromatography-tandem mass spectrometry. *Methods* 39:82–91.
4. Sullards MC, Merrill AH, Jr. (2001) Analysis of sphingosine 1-phosphate, ceramides, and other bioactive sphingolipids by high-performance liquid chromatography-tandem mass spectrometry. *Sci. STKE*. 2001, 11.
5. Sullards MC, Wang E, Peng Q, Merrill AH, Jr. (2003) Metabolomic profiling of sphingolipids in human glioma cell lines by liquid chromatography tandem mass spectrometry. *Cell Mol Biol* 49:789–797.
